1 **Explainable machine learning models of major crop traits from satellite-**  
2 **monitored continent-wide field trial data**

3

4 Saul Justin Newman<sup>\*1,2</sup>, Robert T Furbank<sup>1</sup>

5

6 <sup>1</sup>ARC Centre of Excellence for Translational Photosynthesis, Research School of Biology, Australian  
7 National University

8 <sup>2</sup>Biological Data Science Institute, Australian National University

9 \*Correspondence to: saul.newman@anu.edu.au

10

11 **Abstract**

12 Four species of grass generate half of all human-consumed calories<sup>1</sup>. However,  
13 abundant biological data on species that produce our food remains largely  
14 inaccessible, imposing direct barriers to understanding crop yield and fitness traits.  
15 Here, we assemble and analyse a continent-wide database of field experiments  
16 spanning ten years and hundreds of thousands of machine-phenotyped populations of  
17 ten major crop species. Training an ensemble of machine learning models, using  
18 thousands of variables capturing weather, ground-sensor, soil, chemical and fertiliser  
19 dosage, management, and satellite data, produces robust cross-continent yield models  
20 exceeding  $R^2 = 0.8$  prediction accuracy. In contrast to ‘black box’ analytics, detailed  
21 interrogation of these models reveals fundamental drivers of crop behaviour and  
22 complex interactions predicting yield and agronomic traits. These results demonstrate  
23 the capacity of machine learning models to build unified, interpretable, and  
24 explainable models of crop behaviour, and highlight the powerful role of data in the  
25 future of food.

## 26 **Introduction**

27

28           Over two billion people are projected to enter the world population by 2050<sup>2</sup>.  
29   Feeding these people sustainably requires an improved understanding of the complex  
30   evolutionary interactions driving major crop traits<sup>3,4</sup>, and the application of this  
31   knowledge through plant breeding to produce new crop varieties. However, large-  
32   scale data on the growth and yield traits of major crops remain generally unavailable  
33   or inaccessible to academic scientists<sup>5</sup> and where available, big data often result in  
34   incomprehensible black box models of plant behaviour.

35

36           Here, we demonstrate the promise of machine learning (ML) and artificial  
37   intelligence algorithms to provide robust prediction of important agronomic traits,  
38   including yield, and improve our understanding of crop biology. By linking satellite  
39   data to a freely available ‘big’ dataset, the Australian National Variety Trials (NVTs),  
40   we develop a framework to train and test accurate ML models and extract meaningful  
41   and testable hypotheses from ML models. These findings highlight the power of  
42   unified, comprehensive cross-species models for the prediction and understanding of  
43   vital agronomic traits and crop species.

44

45           The NVT database constitutes one of the largest public experiments on earth  
46   (Fig. 1; Table 1). The NVTs capture over a quarter of a million unique variety-year  
47   observations, and over a million unique population-averaged phenotypes, aggregated  
48   from experimentally replicated plant populations in 6,547 geolocated randomised  
49   controlled experiments (Table 1; see database descriptor in Newman & Furbank<sup>6</sup>).  
50   Each population contains hundreds of individual plants, sown at controlled densities

51 and replicated across a randomised controlled design trial, each conducted and  
52 phenotyped according to highly standardised protocols<sup>7</sup>. As such, the NVTs capture  
53 the aggregated phenotypic variation of hundreds of millions of individual organisms,  
54 across thousands of trial sites containing millions of plant populations<sup>6</sup>.

55

56 We linked these data to extensive satellite data characterising vegetation,  
57 temperature, and spectral patterns<sup>8-11</sup> (Supplementary Table 1; Supplementary Fig. 1),  
58 weather station data from the Australian Bureau of Meteorology (BOM), over 10,000  
59 standardised soil sample tests, extensive observational and site management data,  
60 over 50,000 field-years of stubble burn patterns<sup>12</sup>, the dose and timing of over  
61 350,000 chemical and fertiliser applications, and crop rotation histories for over  
62 10,000 field-years (see Newman & Furbank<sup>6</sup>). Collectively these data capture patterns  
63 of management inputs, vegetation, and environment, and include satellite-derived  
64 observations (Fig. 1b) that improve the categorisation of growing environments,  
65 provide information on canopy level agronomic traits, and reveal the complex  
66 environmental diversity of trial sites (Fig. 1c).

67

68 Using this open source<sup>6</sup> environmental and agronomic database, we train a  
69 suite of robust ML algorithms for the prediction of key agronomic traits including  
70 yield, flowering, and grain protein (Table 1). In addition to providing a catalogue of  
71 phenotype prediction models, these models are used to demonstrate the potential for  
72 ML algorithms to generate comprehensible outputs and testable hypotheses beyond  
73 variable importance rankings and the ‘black box’ paradigm.

74

75           Using targeted ML model interrogation and analysis, we generate candidates  
76 for the causal drivers of complex traits including yield and grain protein content. We  
77 reduce random forests to predictively valuable and readable prediction rules, using an  
78 approach pioneered by Deng<sup>13</sup>, with direct and testable outcomes for agronomic  
79 research. This model reduction approach reveals cross-domain interactions between  
80 variables that robustly predict trait variation. As a result, rather than produce a ‘black  
81 box’ prediction model, these analyses reveal pathways to generate both accurate  
82 forecast models and potentially useful and biologically informative hypotheses.

83 **Results**

84

85 Machine learning provided clear and accurate predictive models across a broad array  
86 of challenges. However, to provide a robust estimate of model accuracy it was  
87 necessary to extend model evaluation beyond the standard analytical framework. The  
88 standard approach to assessing ML accuracy is to use random-sample holdout values,  
89 with random observations excluded from the dataset prior to model training, and these  
90 values subsequently used as predictive targets to evaluate model accuracy. However,  
91 across all models this testing approach generated a misleading picture of model  
92 accuracy (Supplementary Table 2).

93

94 Model accuracy appeared to be systematically over-estimated when using random-  
95 sample holdout populations (Supplementary Table 2). We overcame this problem  
96 using a more rigorous model evaluation framework (Fig. 2) that tested machine-  
97 learning models using unobserved randomly-sampled field trials (hereafter ‘holdout  
98 trial prediction’; Fig. 2a-b), or all field trials observed in ‘future’ years hidden from  
99 model training (hereafter ‘annual forecast prediction’; Fig. 2a,c). By testing models in  
100 locations and years excluded from model training, this approach substantially reduced  
101 the reported accuracy of ML models (Supplementary Table 2) while ensuring  
102 structural risk minimisation and robust, translatable models. For example, under the  
103 standard random holdout data approach LSVM models reported an  $R^2 = 0.99$   
104 prediction accuracy (Supplementary Table 2; RMSE = 0.17; N = 90,765). When the  
105 same models were evaluated using holdout trial prediction, predicting unobserved  
106 randomly-sampled field trial locations, model accuracy fell to between  $R^2 = 0.64$  and  
107 0.68 (RMSE = 1.09-1.50; Supplementary Table 2; Supplementary Code 1).

108

109 Despite reduced model accuracy under these more stringent test criteria, the accurate  
110 prediction of complex traits was possible under a wide range of ML models (Table 2).  
111 For example, when trained for the holdout trial prediction of yield using full-season  
112 data across all species (Fig. 3) foundational ML models such as unstratified ‘naïve’  
113 Breiman-Cutler Random Forests<sup>14,15</sup> (BCRFs; Fig. 3b;  $R^2 = 0.82$ ) and BCRFs cross-  
114 validated by calendar year (xvBCRFs; Fig. 3c;  $R^2 = 0.84$ ) captured variation within  
115 years with over  $R^2 = 0.8$  accuracy (N=3,182;  $p < 10e-16$ ; Supplementary Code 1),  
116 while extreme gradient boosting models<sup>16</sup> (XGBMs; Fig. 3d;  $R^2 = 0.78$ ), recursively  
117 partitioned regression models<sup>17</sup> or decision trees (RPRMs; Fig. 3a;  $R^2 = 0.76$ ), linear  
118 support vector machines<sup>18,19</sup> (LSVMs; Fig. 3e;  $R^2 = 0.68$ ) and partial least squared  
119 regression models<sup>20</sup> (PLSRs; Fig. 3f;  $R^2 = 0.76$ ) captured marked yield variation  
120 (N=3,101;  $p < 10e-16$ ; Supplementary Code 1).

121

122 While baseline accuracy was high, ML models exhibited different performance across  
123 prediction challenges. These included agronomically relevant problems, such as using  
124 the data available at the time of sowing (TOS) for prediction of end-of-season  
125 phenotypic variation in new locations (Fig. 3; Table 2), the projection of end-of-  
126 season yield as a season progresses (Supplementary Fig. 2), and annual forecast  
127 predictions (Fig. 4; Table 2).

128

129 Model accuracy extended to other agronomically important complex traits. Several  
130 traits could be predicted under holdout trial prediction and annual forecasts with  
131 accuracy of  $R^2=0.5$  or more (Supplementary Fig. 3a-c), including complex traits such  
132 as protein ( $R^2=0.48$ ; Supplementary Fig. 3a), flowering time ( $R^2 = 0.53$ ;

133 Supplementary Fig. 3b), and Glucosinolate content ( $R^2=0.58$ ; Supplementary Fig. 3c),  
134 while prediction of other traits such as proxy metrics of grain volume proved more  
135 challenging (Supplementary Fig. 3d-f).

136

137 Predictive accuracy was largely retained in models trained using only data available at  
138 the TOS. Under holdout trial prediction, yield data could be predicted with up to  
139  $R^2=0.80$  accuracy under stratified cross-validated BCRFs (Table 2), while methods  
140 such as LSVMs ( $R^2 = 0.64$ ), XGBMs ( $R^2 = 0.64$ ), and PLSRs ( $R^2 = 0.58$ ) displayed  
141 more limited accuracy (Table 2).

142

143 Unsurprisingly, ML model accuracy fell under all annual forecast prediction tests  
144 (Table 2). For full-season data, over rolling annual forecasts, BCRF models retained  
145 the highest accuracy when predicting yield (black line Fig. 4; Table 2; Supplementary  
146 Code 1), followed by the PLSR model (blue line Fig. 4;  $R^2 = 0.74$ ; Table 2), and the  
147 XGBM ( $R^2 = 0.69$ ; Supplementary Code 1). Similar patterns in accuracy occurred for  
148 ML models trained on data available at the TOS, 100 days after sowing (DAS) and  
149 200 DAS, tested in 2018 only rather than rolling annual forecasts (Table 2). Again,  
150 the BCRF and PLSR models had the highest predictive accuracy, with the greatest  
151 reduction and lowest absolute accuracy in the LSVMs (from  $R^2 = 0.64-0.68$  to  $R^2 =$   
152  $0.37-0.45$ ; Table 2).

153

154 As expected, ML approaches generally increased in accuracy with the inclusion of  
155 more years' data (Fig. 4), and for predictions made at progressively later points in the  
156 growing season (Supplementary Fig. 3). However, rolling forecast data, in which  
157 models were used to predict variation in the next calendar year, displayed surprising

158 patterns. Concurrent shifts in forecast accuracy occurred across different models,  
159 phenotypes, and species (Fig. 4a-b) with accuracy increasing (*e.g.* 2011-2012 and  
160 2013-2014) or decreasing (*e.g.* 2015-2016) across diverse models and phenotypes.  
161 While observations were limited, changes in model forecast accuracy were correlated  
162 across ML models and species ( $p < 0.02$ ; Supplementary Code 1) despite fixed model  
163 training parameters, the relatively constant sample size of target data, and the absence  
164 of overfitting (as measured in random holdout trials; Fig. 1b; Table 2). Some years  
165 were less predictable, across models and species, independent of model construction  
166 and sample size.  
167  
168 Annual forecast and random holdout trial prediction models were constructed both  
169 with and without partitioning crops into separate datasets for model training  
170 (Supplementary Code 1). For models such as xvBCRFs and LSVMS, incorporating  
171 all species in a single ‘omnibus’ dataset often, unsurprisingly, led to less accurate  
172 models (Supplementary Table 3). However, in some notable cases implementing a  
173 unified approach, where crop types were fit as binary independent variables,  
174 generated models of comparable or greater accuracy than models with identical  
175 parameters trained on single-species data (Fig. 3; Supplementary Fig. 4;  
176 Supplementary Code 1). For example, when predicting wheat yield in 2018, annual  
177 forecast models trained using only wheat data to 100 DAS had  $R^2=0.66$  accuracy  
178 under naïve BCRFs,  $R^2=0.38$  under LSVMS, and  $R^2=0.59$  under PLSR models  
179 (Supplementary Code 1). When these models were re-trained using cross-species  
180 data, using identical parameters, accuracy of 2018 wheat yield predictions improved  
181 marginally to  $R^2 = 0.69$  for BCRFs,  $R^2 = 0.40$  for LSVMS, and  $R^2 = 0.65$  for PLSRs  
182 (Supplementary Code 1). In Canola, construction of ‘omnibus’ cross-species models



183 more substantially modified accuracy: at 100 DAS accuracy increased from  $R^2 = 0.28$   
184 to 0.60 in naïve BCRF, and from  $R^2 = 0.19$  to 0.37 in PLSRs, with a low-accuracy  
185 model of  $R^2 = 0.11$  falling to  $R^2 = -0.008$  in the high prediction variance LSVM  
186 models (Supplementary Code 1).

187

188 Assessing the features and interactions behind predictively accurate models was  
189 approached on several fronts. While ‘black box’ models are generally impenetrable to  
190 further analysis, altering model inputs and examining shifts in model accuracy can  
191 provide limited insight into model mechanics. Collectively, for example, remote  
192 sensing data were a key driver of model accuracy (Supplementary Fig. 5;  
193 Supplementary Fig. 6). Under a leave-one-out model testing approach, removal of the  
194 remote sensing variables caused the greatest loss in predictive value (Supplementary  
195 Fig. 5; Supplementary Code 2) compared to the more marginal effect of removing  
196 management data, BOM weather station data, or metadata (Supplementary Fig. 5;  
197 Supplementary Code 2). This pattern, where satellite data held the greatest predictive  
198 value for model training, was reinforced across holdout trial and annual forecast  
199 model assessment (Supplementary Code 1). For example, under RPRM models the  
200 removal of satellite data reduces the accuracy of wheat yield annual forecast models,  
201 from  $R^2 = 0.75$  for models containing all input variables, to just  $R^2 = 0.36$  for models  
202 trained without satellite data (Supplementary Code 2). In contrast, the impact from  
203 removal of either weather station data, management data or metadata was, at worst, a  
204 marginal reduction in accuracy from  $R^2 = 0.75$  to 0.71 (Supplementary Code 2).

205

206 Re-training models using only single domains, such as using only management or  
207 satellite data for model training, provided insight into the predictive value of domains

208 without cross-domain interactions (Supplementary Fig. 6). Again, satellite data had  
209 the greatest contribution to accuracy in all ML models. Models constructed  
210 exclusively using satellite data predicted wheat yield variation with  $R^2=0.71$  accuracy  
211 (Supplementary Fig. 6), exceeding the accuracy of metadata-only ( $R^2=0.59$ ),  
212 management-only ( $R^2=0.37$ ), and weather station data only models ( $R^2=0.34$ ;  
213 Supplementary Fig. 6; Supplementary Code 1). While valuable, interrogating model  
214 accuracy in this way was fundamentally constrained: assessing the interactive  
215 contributions of smaller variable groupings and individual variables was not  
216 combinatorially limited.

217

218 Further interrogation of model dynamics, using ML algorithm heuristics that rank  
219 features by their importance, revealed the nominal predictive value of individual  
220 variables (Fig. 5). These feature detection and scoring methods showed limited  
221 concordance (Fig. 5a-c), with some differences likely arising from the diverse scoring  
222 methods employed (Supplementary Code 1). However, some variables, such as  
223 accumulated rainfall, attained high importance ranks across all models (blue points;  
224 Fig. 5d). Across PLSR, RPRM and BCRF models, consistently high importance ranks  
225 were assigned to cumulative rainfall, latent heat flux (an indicator of transpiration  
226 rates<sup>21</sup> and stomatal<sup>22</sup> conductance across a canopy), application rates of Sulphur, and  
227 application of the pesticide Clethodim (Fig. 5a-c).

228

229 However, variable importance scores lack an indication of the direction of effect, and  
230 any indication of whether orthogonal or interactive effects underpin the predictive  
231 value of 'important' variables. As such, ML models were interrogated to generate  
232 interpretable outputs.

233

234 Decision trees generated by RPRMs include the direction of observed effects, and  
235 reveal possible variable interactions through hierarchical dependencies within  
236 decision trees (Fig. S7-S8; Supplementary Data 1). For example, the yield-predictive  
237 RPRM in Supplementary Data 1 reveals that, in TOS-only and full-season prediction  
238 models, lower soil sodicity, higher soil carbon, phosphorous, and nitrogen, and higher  
239 doses of total applied of nitrogen and phosphorous were uniformly predictive of  
240 higher yield. Other interactions were context dependent: for example, higher rainfall  
241 was predictive of higher yield in eight of the fourteen decision points in the full-  
242 season RPRM model above (Data S1). Species-targeted RRPM decision trees also  
243 provided insight onto the full-season (Supplementary Fig. 7) and pre-sowing  
244 predictors of yield (Supplementary Fig. 8; Supplementary Data 1). Decision points in  
245 these trees included well-known agronomic interactions, such as gains in wheat yield  
246 from the pre-sowing application of nitrogen fertilisers or monoammonium phosphate  
247 (Supplementary Fig. 8), as well as previously unknown interactions, for example the  
248 discrimination between lower-yielding populations through satellite reflectance bands  
249 and latent heat flux (leftmost branches; Supplementary Fig. 7).

250

251 Visual inspection of tree-based models does not work at scale, for example when  
252 generating a forest of thousands of decision trees using BCRFs. We overcame this  
253 problem by reducing BCRFs to their most common and predictively robust decision  
254 sub-trees (the most common sequences of decisions within a random forest of  
255 decision trees) using the inTrees analytical approach of Deng<sup>13</sup>. This approach  
256 revealed complex yield-predictive dependencies between remote sensing,  
257 environmental, and management inputs (Table 3-4). For example, the most common

258 predictively robust decision sub-tree in canola constitutes a complex cross-domain  
259 dependency (Table 3) where the effect of the normalised differenced vegetation index  
260 on canola yield depends, respectively, on the MODIS band 7 reflectance exceeding  
261 0.10, and the total accumulated rainfall to 150 DAS falling below 310mm. Similar  
262 patterns were revealed in wheat: for example, a high enhanced vegetation index at  
263 160 DAS and a high maximum enhanced vegetation index at 150 DAS predicted a  
264 high 5.5 t/Ha yield. Low-yield prediction rules included indicators of vegetation  
265 stress, such as the prediction of low (1.1t/ha) yields from a combined low fraction of  
266 photosynthetically absorbed radiation, low normalised differenced vegetation index,  
267 and a high middle infrared reflectance value; or the low yields (0.8 t/Ha) predicted by  
268 a combined high MODIS reflectance band 7 value and low observed latent heat flux  
269 (an indicator of the extent of stomatal closure, leaf hydraulics, and crop  
270 evapotranspiration<sup>21-23</sup>) during the growing season (Table 4).

271

272 In line with their high importance ranks across models and their over-representation  
273 in RPART decision trees, and despite each constituting only 2.2% of all predictor  
274 variables in the initial model, vegetation indices, gross primary productivity and latent  
275 heat flux were common across predictively valuable sub-trees (Table 3-4). For  
276 example, NDVI occurs in 13% (11/83) of all decisions in Table 3-4, yet constitutes  
277 only 2.2% of all input variables. Likewise, cumulative rainfall (0.04% of the initial  
278 predictor variables) is present in nine of the 26 prediction rules and constitutes 11% of  
279 the prediction rule chains: a 25-fold overrepresentation.

280 **Discussion**

281

282 Foundational crops such as wheat, canola, and oats provide a substantial fraction of  
283 total human caloric intake<sup>1</sup>. However, traits underpinning the yield of these species  
284 are driven by poorly-understood complex interactions. In particular, environments are  
285 largely characterised using ground-station data and, increasingly, highly complex but  
286 variable-coverage drone data. These approaches overlook the opportunity of satellites  
287 as consistent, regularly-timed, instantaneous, and global instruments for capturing  
288 environmental variation.

289

290 In this study, low-resolution satellite data is used to characterise environmental  
291 diversity across sites, providing several novel insights into crop yield. Even these  
292 crude whole-site measures added substantial predictive capacity to our models  
293 (Supplementary Fig. 1; Supplementary Fig. 7-8). In particular, our findings suggest  
294 the importance of latent heat flux, a proxy for both water availability<sup>21</sup>, stomatal  
295 conductance<sup>21,22</sup>, and canopy transpiration rates<sup>22</sup>, as a predictor of yield variation  
296 across sites.

297

298 These findings suggest the remarkable potential for both existing low-resolution and  
299 developing higher resolution satellite resources for agriculture and plant breeding. In  
300 contrast with the 250m-1000m pixel daily resolution data used here, sub-40cm  
301 resolution data will be available multiple times daily from multiple providers as soon  
302 as late 2021. This resolution is sufficient to resolve, for example, individual cotton  
303 and canola plants every clear day throughout a field season. Capturing environmental  
304 patterns at this spatial and temporal scale, along with the potential for direct satellite

305 observation of key agronomic traits such as growth patterns and phenology<sup>24</sup>, has the  
306 capacity to dramatically alter the conduct of large-scale plant breeding trials. If these  
307 data can be meaningfully integrated into plant breeding models and used to inform  
308 plant biology, high-resolution satellite data has a substantial future in agronomy.

309

310 Integration of satellite data, and drone and large 'omics data, into plant breeding  
311 models has largely been constrained by statistical barriers. It is generally easier to  
312 generate 'big' data, and saturate plant populations with variables, than provide a  
313 meaningful analysis of such data. That is not to say such success is not possible: for  
314 example, large 'omics data sets may be reduced to indices or trait values without  
315 substantial information loss<sup>25</sup>. However, this dimension reduction approach is not  
316 always appropriate and may reveal little or nothing about the interactions between  
317 variables. Integrating data into ML pipelines with comprehensible model mechanics,  
318 and carefully interpreting the results, provides a pathway to solve these problems and  
319 meaningfully integrate advances in data generation with plant breeding platforms<sup>25</sup>.

320

321 A major advantage of ML models is the capacity to generate a one-shot model that  
322 captures interactions across multiple domains, such as the management-environment  
323 interactions shown in Supplementary Fig. 7-8. While our focus has been the capture  
324 of environmental interactions, our findings highlight the potential of ML to capture  
325 interactions across further data layers: metabolomic, transcriptomic, proteomic and  
326 large-scale phenomic data are all suitable for inclusion into a unified ML model.

327

328 While the promise of ML models is considerable, gains in predictive accuracy are  
329 limited by fundamental challenges. For example, concurrent changes in model

330 accuracy across diverse models and species are unlikely to be a result of overfitting  
331 (Fig. 4). Rather, these patterns may arise due to fundamental model limitations when  
332 extrapolating in complex systems<sup>26–28</sup>. For example, while ML models generalise well  
333 across observed data, they suffer direct constraints on predictive accuracy under  
334 pattern-extrapolation. This is epitomised by the ‘checkerboard problem’, where ML  
335 models fail to extrapolate the alternating pattern of black and white squares from a  
336 smaller to a larger checkerboard<sup>27</sup>. The failure of ML models to extrapolate  
337 phenotypes to future years, across a stochastic ‘checkerboard’ of switching between  
338 El Niño, neutral, and La Niña climates, may therefore represent a failure of ML  
339 algorithms to extrapolate complex patterns.

340

341 Likewise, non-stationarity, a shift in mean and variance over time, places fundamental  
342 limits on the accuracy of all statistical models<sup>28</sup>. Cross-model changes in accuracy,  
343 when projecting new fields and years (Fig. 4), may reflect the independent or  
344 combined role of non-stationarity of management practices, soil diversity, hidden  
345 genetic diversity over time, or the role of climatic or environmental non-stationarity  
346 (Fig 4.; Supplementary Fig. 9) over time.

347

348 As such, shifts in predictability of crop behaviour across the NVTs raises important  
349 questions on systems dynamics. If non-stationarity in the Australian climate drives  
350 collapses in the predictability of a complex system, crop behaviour and yield, within  
351 the space of a single year (Fig. 4), this has important ramifications for agronomy  
352 under climate change. Climates are becoming increasingly nonstationary<sup>29</sup>, including  
353 Australian grain-growing regions<sup>30–32</sup>, causing a dramatic global loss in the  
354 predictability of rainfall patterns<sup>29</sup> and temperatures<sup>33,34</sup>.

355

356 Non-stationary rainfall patterns are particularly concerning. Already, a quarter<sup>35</sup> of the  
357 global land surface area has non-stationary rainfall patterns, and this fraction is  
358 rising<sup>35</sup>. This increasing climate non-stationarity causes crop breeding targets to  
359 become intrinsically less predictable, regardless of advances in models or  
360 methodology. Crop breeding pipelines from initial plant crosses to the release of new  
361 varieties require development times of around ten years<sup>36</sup>. If the degree of climatic  
362 non-stationarity increases within this horizon, and future climatic patterns become  
363 less predictable as targets for plant breeding, climate instability may pose a serious  
364 challenge to food production systems<sup>37</sup> given fundamental bounds on model  
365 predictability<sup>28</sup>.

366

367 There remains considerable cause for optimism from ML algorithms beyond these  
368 limitations. As we have shown, ML models can learn and recall the growing season of  
369 millions of plants, integrate these data into meaningful models, and accurately  
370 forecast phenotypic variation. Furthermore, the promise of ‘big data’ and ML in  
371 agriculture is not constrained to gains in prediction accuracy. While improved  
372 accuracy from ‘black box’ models has enormous utility for share trading or insurance,  
373 such models often have more limited scientific and in-field applications. For the  
374 greatest utility for farmers and biologists ML models need to be made accessible and  
375 understandable, even at the cost of predictive accuracy.

376

377 Predictions from neural networks or deep learning models are often more accurate  
378 yet, with some exceptions<sup>38,39</sup>, are not comprehensible by examination of model  
379 dynamics. Even when black box models produce variable importance rankings (*e.g.*



380 Fig. 5) it is unclear whether high-ranked predictive variables interact with one another  
381 or act independently, or in what context they are most important, when generating a  
382 predictive outcome. In contrast, approaches such as RPRMs and BCRFs allow the  
383 understanding and interrogation of internal model dynamics: it is possible to ask *why*  
384 an algorithm generated a specific prediction.

385

386 For example, trusting Cauers' conceptual "black box" to evaluate our models  
387 produced may have resulted in a surprising conclusion: that use of herbicides  
388 routinely has an inhibitory effect on yield. For example, in the model shown in  
389 Supplementary Fig. 7, reduced yield was predicted by the previous application of  
390 common herbicides such as Roundup (1.3t/Ha yield loss) and Cadence (1.8t/Ha yield  
391 loss). However, the conclusion that herbicides are yield-inhibitory is likely incorrect.  
392 Herbicide application is confounded with pathogens, environmental stress, and  
393 degraded soils: as such, herbicide use may predict lower yield because herbicide use  
394 is more likely under worse growing conditions. Discrimination between these cases  
395 depends on careful analysis of model mechanics, a process that is not possible within  
396 true 'black box' models.

397

398 Likewise, across the NVTs zero-yield and extremely low-yield trials are not missing  
399 at random, but have been actively removed. This violation of the 'missing completely  
400 at random' criteria<sup>40,41</sup> has counterintuitive effects that are independent of the applied  
401 predictive model. For example, increasing frost severity is predictive of increasing  
402 crop yield across trials (Supplementary Fig. 10). This is not necessarily a result of  
403 severe frosts causing better crop yield but, more likely, because the removal of low-  
404 and zero-yield trials has generated a non-random survival bias: better-conditioned,

405 higher-yield crops are most likely to survive a severe frost than crops in stressed and  
406 suboptimal environments. As a result, higher yields may be positively correlated with  
407 a worse environment purely as a statistical artefact. Black box models are not panacea  
408 against such subtle issues.

409

410 Interpretation of machine learning models should not, therefore, be reliant on the  
411 simple scoring of variable importance. Rather, our results suggest that detailed  
412 assessment of the internal mechanics of machine learning models is a key analytical  
413 challenge for biologists who seek to understand, rather than simply predict, biological  
414 systems.

415 **Methods**

416

417 Compilation of the NVT data resulted in the location and measurement of 266,033  
418 variety-trial combinations, aggregated from 780,569 field trial plots in 6,547  
419 successful (or non-failed) field trials. Linked to these data were over eight thousand  
420 variables, including approximately ten thousand field-years of soil samples and  
421 hundreds of thousands of chemical and fertiliser doses. A total of seventy phenotypic  
422 traits were available, for over one and a half million unique phenotypic  
423 measurements<sup>6</sup>. Of these, seven agronomically important traits, of sufficient data  
424 quality and sample size, were selected to train machine learning algorithms: grain  
425 protein percentage, days to 50% flowering, percentage Glucosinolate oil content,  
426 Hectolitre weight, thousand grain weight, the fraction of grain sieving below 2.0mm,  
427 and yield (Table 1; Supplementary Fig. 3-4).

428

429 Data used to train PLSRs, XGBMs, and LSVMs were dummy-coded for factors, and  
430 transformed to zero mean and unit variance for numeric data (see database descriptor  
431 for further details<sup>6</sup>). However, tree-based algorithms partition the input space based  
432 on the non-transformed target variable, and do not require rescaling to avoid model fit  
433 biases. As such, to preserve the direction and magnitude of effects and facilitate  
434 interpretable models, non-transformed data were used to train RPRMs, BCRF, and  
435 xvBCRF models.

436

437 Missing data were concentrated into missing metadata and field trial comments  
438 measured in small subsets of trials, such as disease scores and animal damage scores.

439 Only 0.05% of all satellite data were missing, generally as a result of a pixel failing  
440 the quality control screening of a NASA data product algorithm. Broader  
441 environmental data, including ground sensor arrays and weather station data, were  
442 0.7% missing. All missing data were imputed using two approaches, described in  
443 further detail in the associated Database descriptor<sup>6</sup>, for both untransformed and unit-  
444 variance, zero-mean transformed data. The variance in model accuracy arising from  
445 imputation noise and error was evaluated by applying machine learning models to all  
446 imputed datasets, predicting site-mean yield, and measuring model accuracy post-  
447 imputation (Supplementary Fig. 11; Supplementary Code 1).

448

449 Models were trained using, as often as appropriate, default tuning and input  
450 parameters. Hyperparameters for model training were subjected to minimal training  
451 and optimisation, with parameters given in Supplementary Table 4. All models were  
452 subjected to 10-fold internal cross-validation, with identical training and target data  
453 across models, to allow direct comparisons of accuracy.

454

455 *Training targets*

456

457 Yield models were initially trained to predict two holdout samples: a ‘holdout trial’  
458 set of 100 field trials randomly sampled from the years 2008-2017, and an ‘annual  
459 forecast’ sample consisting of all data from 2018 (Fig. 2). Models were trained on  
460 data from 2008-2017 excluding the random holdout trials, and used to predict both the  
461 holdout trials and the 2018 data. For rolling forecast models presented in Fig. 4, no  
462 holdout trial sample was selected: instead, models were trained on all data before each  
463 successive cut-off year, and tested on the next year’s data.

464

465 In-season rolling forecasts were developed using all data available before a given  
466 time, relative to sowing, and using these data to predict end-of-season yield in Canola  
467 and Wheat only. The three most functionally distinct methods were used: tree-based  
468 Naïve BCRFs trained in ranger, kernel-based LSVMs, and principal components  
469 regression-based PLSRs. As in previous models, PLSR models were trained using 10-  
470 fold crossvalidation, in 10 segments, using default loss criteria (Supplementary Code  
471 2). Due to the greater sample size constrains, these variety-specific models were  
472 subjected to random holdout trial prediction only (Fig. 2).

473

#### 474 *Algorithms and hyperparameters*

475

476 Hyperparameters used in model training tasks are given in Supplementary Table 4  
477 and Supplementary Code 1 and 2.

478

479 Random forest models were constructed using three different approaches: naïve  
480 Breiman-cutler random forests (BCRFs) trained using the Ranger implementation<sup>42</sup>,  
481 BCRFs cross-validated by calendar year such that test data was never in the same year  
482 as training data<sup>15</sup> (xvBCRF), and extreme gradient-boosted forest models (XGBMs).  
483 To preserve the magnitude of changes to leaf node averages caused by decision points  
484 (*e.g.* Supplementary Fig. 7-8), and the heuristics derived from these decisions (Table  
485 3-4), RPRMs, BCRFs, and xvBCRFs were trained using non-scaled data. Unlike other  
486 machine learning methods, scaling does not impact the accuracy of these tree-based  
487 partitioning methods.

488

489 Extreme gradient boosting machines (XGBMs), Linear support vector machines<sup>19</sup>  
490 (LSVMs) and Partial Least Squared Regressions<sup>20</sup> (PLSRs) were trained using data  
491 rescaled to zero mean and unit variance, with factors excluded (*e.g.* unstructured crop  
492 comment fields, unique trial identifiers) or dummy-coded (*e.g.* varieties observed in  
493 over  $N > 1000$  plots, breeder names, experimental series, trial operators, trial  
494 comments common to  $> 1000$  trials, crop species; see Supplementary Code 1;  
495 Supplementary Code 2).

496

497 The LSVM regression models were constructed using a grid-based stepwise search  
498 using fixed gamma and lambda values defined in Supplementary Table 4. Each  
499 LSVM was subject to 10-fold internal cross-validation, tuned over a 10x10  
500 hyperparameter grid, using the “liquidSVM” package<sup>19</sup>.

501

502 *Importance and heuristic rule reduction*

503

504 Variable importance scores were returned using default heuristics from the RPRM  
505 and BCRF models, and variable importance was approximated in PLSR models by  
506 dividing coefficients by the sum of the absolute value of the coefficient matrix (Fig. 4;  
507 Supplementary Code 1). To reveal common interactions predictive of phenotypic  
508 variation, xvBCRF models were subjected to the analytical pipeline described in  
509 Deng<sup>13</sup>. This approach aggregates the frequency of all sub-trees of decisions within  
510 random forests, to reveal the most common predictive decision sequences or paths  
511 (Supplementary Code 2). This set of decision paths is then pruned by treating  
512 common decision paths as features, re-training a regularised random forest using  
513 these and all previous features, and ranking the importance these decision paths in the

514 subsequent model. By treating this interaction as a feature, the importance of complex  
515 dependencies between variables may be explicitly stated, in a way that is impossible  
516 with black-box models. Therefore, all predictively valuable decision paths were  
517 captured for all cross-species and species-specific xvBCRF yield models  
518 (Supplementary Code 2).

519

520 All data are available in the linked Database descriptor<sup>6</sup>, from the associated figshare  
521 repository, or on request from the corresponding author. All code and secondary data  
522 generated by this analysis, such as models and decision trees, are available in the  
523 supplementary data and from the corresponding author.

524 **References**

525

- 526 1. Food and Agriculture Organization of the United Nations Statistics  
527 Division. FAOSTAT Food Balance Sheet. *Food Balance Sheets*  
528 <http://faostat3.fao.org/download/FB/FBS/E> (2016).
- 529 2. United Nations. World Population Prospects: The 2015 Revision. *United*  
530 *Nations Econ. Soc. Aff. XXXIII*, 1–66 (2015).
- 531 3. Burgueño, J., de los Campos, G., Weigel, K. & Crossa, J. Genomic prediction  
532 of breeding values when modeling genotype × environment interaction  
533 using pedigree and dense molecular markers. *Crop Sci.* **52**, 707–719  
534 (2012).
- 535 4. Cabrera-Bosquet, L., Crossa, J., von Zitzewitz, J., Serret, M. D. & Luis Araus, J.  
536 High-throughput Phenotyping and Genomic Selection: The Frontiers of  
537 Crop Breeding Converge. *J. Integr. Plant Biol.* (2012) doi:10.1111/j.1744-  
538 7909.2012.01116.x.
- 539 5. Zamir, D. Where Have All the Crop Phenotypes Gone? *PLoS Biol.* **11**,  
540 e1001595 (2013).
- 541 6. Newman, S. J. & Furbank, R. T. A Multiple Species, Continent-Wide, Million-  
542 Phenotype Agronomic Plant Database. *Sci. Data* (2021). *In Press*.
- 543 7. Grains Research and Developmen Corporation. NVT Protocols v1.1. 75  
544 [https://web.archive.org/web/20200317222554/https://www.nvtonline.](https://web.archive.org/web/20200317222554/https://www.nvtonline.com.au/nvt-protocols/)  
545 [com.au/nvt-protocols/](https://web.archive.org/web/20200317222554/https://www.nvtonline.com.au/nvt-protocols/) (2020).
- 546 8. Justice, C. O. *et al.* Land and cryosphere products from Suomi NPP VIIRS:  
547 Overview and status. *J. Geophys. Res. Atmos.* **118**, 9753–9765 (2013).
- 548 9. Cohen, W. B. & Justice, C. O. Validating MODIS terrestrial ecology products:



- 549            Linking in situ and satellite measurements. *Remote Sens. Environ.* **70**, 1–3  
550            (1999).
- 551    10.    Wan, Z., Zhang, Y., Zhang, Q. & Li, Z.-L. Quality assessment and validation of  
552            the MODIS global land surface temperature. *Int. J. Remote Sens.* **25**, 261–  
553            274 (2004).
- 554    11.    Huete, A. *et al.* Overview of the radiometric and biophysical performance  
555            of the MODIS vegetation indices. *Remote Sens. Environ.* **83**, 195–213  
556            (2002).
- 557    12.    Schroeder, W., Oliva, P., Giglio, L. & Csiszar, I. A. The New VIIRS 375m  
558            active fire detection data product: Algorithm description and initial  
559            assessment. *Remote Sens. Environ.* **143**, 85–96 (2014).
- 560    13.    Deng, H. Interpreting Tree Ensembles with inTrees. *arXiv* (2014).
- 561    14.    Breiman, L. & Cutler, A. Breiman and Cutler’s random forests for  
562            classification and regression. *Package ‘randomForest’* 29 [https://cran.r-](https://cran.r-project.org/web/packages/randomForest/randomForest.pdf)  
563            [project.org/web/packages/randomForest/randomForest.pdf](https://cran.r-project.org/web/packages/randomForest/randomForest.pdf) (2012).
- 564    15.    Breiman, L. Random forests. *Mach. Learn.* **45**, 5–32 (2001).
- 565    16.    Friedman, J. H. Greedy function approximation: A gradient boosting  
566            machine. *Ann. Stat.* 1189–1232 (2001) doi:10.1214/aos/1013203451.
- 567    17.    Breiman, L., Friedman, J. H., Olshen, R. A. & Stone, C. J. *Classification and*  
568            *Regression Trees. The Wadsworth statisticsprobability series* vol. 19 (1984).
- 569    18.    Cortes, C. & Vapnik, V. Support-Vector Networks. *Mach. Learn.* **20**, 273–  
570            297 (1995).
- 571    19.    Steinwart, I. & Thomann, P. *Package ‘liquidSVM’*. *R Software package*,  
572            *available at* <https://cran.r-project.org/web/packages/liquidSVM> (2017).
- 573    20.    Mevik, B. H. & Wehrens, R. The pls package: Principal component and

- 574 partial least squares regression in *R. J. Stat. Softw.* **18**, (2007).
- 575 21. Schymanski, S. J., Or, D. & Zwieniecki, M. Stomatal Control and Leaf  
576 Thermal and Hydraulic Capacitances under Rapid Environmental  
577 Fluctuations. *PLoS One* (2013) doi:10.1371/journal.pone.0054231.
- 578 22. Vialet-Chabrand, S. & Lawson, T. Dynamic leaf energy balance: Deriving  
579 stomatal conductance from thermal imaging in a dynamic environment. *J.*  
580 *Exp. Bot.* (2019) doi:10.1093/jxb/erz068.
- 581 23. Gonzalez-Dugo, M. P. *et al.* A comparison of operational remote sensing-  
582 based models for estimating crop evapotranspiration. *Agric. For. Meteorol.*  
583 **149**, 1843–1853 (2009).
- 584 24. Sánchez-Azofeifa, A. *et al.* Estimation of the distribution of *Tabebuia*  
585 *guayacan* (Bignoniaceae) using high-resolution remote sensing imagery.  
586 *Sensors* (2011) doi:10.3390/s110403831.
- 587 25. Furbank, R. T., Sirault, X. R. R. & Stone, E. Plant phenome to genome: a big  
588 data challenge. in *Sustaining Global Food Security: The Nexus of Science and*  
589 *Policy* 203–223 (2020).
- 590 26. Alcorn, M. A. *et al.* Strike (with) a pose: Neural networks are easily fooled  
591 by strange poses of familiar objects. in *Proceedings of the IEEE Computer*  
592 *Society Conference on Computer Vision and Pattern Recognition* (2019).  
593 doi:10.1109/CVPR.2019.00498.
- 594 27. Holloway, E. The Unlearnable Checkerboard Pattern. *Commun. Blyth Inst.*  
595 (2019) doi:10.33014/issn.2640-5652.1.2.holloway.1.
- 596 28. Mohri, M. & Medina, A. M. New analysis and algorithm for learning with  
597 drifting distributions. in *Algorithmic Learning Theory* 124–138 (Springer  
598 Verlag, 2012).

- 599 29. Lehmann, J., Coumou, D. & Frieler, K. Increased record-breaking  
600 precipitation events under global warming. *Clim. Change* (2015)  
601 doi:10.1007/s10584-015-1434-y.
- 602 30. Westra, S. & Sisson, S. A. Detection of non-stationarity in precipitation  
603 extremes using a max-stable process model. *J. Hydrol.* (2011)  
604 doi:10.1016/j.jhydrol.2011.06.014.
- 605 31. Vaze, J. *et al.* Climate non-stationarity - Validity of calibrated rainfall-runoff  
606 models for use in climate change studies. *J. Hydrol.* **394**, (2010).
- 607 32. Verdon-Kidd, D. C. & Kiem, A. S. Quantifying drought risk in a  
608 nonstationary climate. *J. Hydrometeorol.* (2010)  
609 doi:10.1175/2010JHM1215.1.
- 610 33. Milly, P. C. D. *et al.* Climate change: Stationarity is dead: Whither water  
611 management? *Science* (2008) doi:10.1126/science.1151915.
- 612 34. IPCC, I. P. O. C. C. Climate Change 2007 - The Physical Science Basis:  
613 Working Group I Contribution to the Fourth Assessment Report of the  
614 IPCC. *Science (80-. )*. (2007) doi:volume.
- 615 35. Sun, F., Roderick, M. L. & Farquhar, G. D. Rainfall statistics, stationarity, and  
616 climate change. *Proc. Natl. Acad. Sci. U. S. A.* (2018)  
617 doi:10.1073/pnas.1705349115.
- 618 36. Lenaerts, B., Collard, B. C. Y. & Demont, M. Review: Improving global food  
619 security through accelerated plant breeding. *Plant Science* (2019)  
620 doi:10.1016/j.plantsci.2019.110207.
- 621 37. McCarl, B., Villavicencio, X. & Wu, X. Climate Change and Future Analysis: Is  
622 Stationarity Dying? *Am. J. Agric. Econ.* **90**, 1241–1247 (2008).
- 623 38. Towell, G. G. & Shavlik, J. W. Knowledge-based artificial neural networks.

- 624            *Artif. Intell.* (1994) doi:10.1016/0004-3702(94)90105-8.
- 625    39.    Bae, J. K. & Kim, J. Combining models from neural networks and inductive  
626            learning algorithms. *Expert Syst. Appl.* (2011)  
627            doi:10.1016/j.eswa.2010.09.161.
- 628    40.    Jamshidian, M. & Jalal, S. Tests of homoscedasticity, normality, and missing  
629            completely at random for incomplete multivariate data. *Psychometrika* **75**,  
630            649–674 (2010).
- 631    41.    Dong, Y. & Peng, C.-Y. J. Principled missing data methods for researchers.  
632            *Springerplus* **2**, 222 (2013).
- 633    42.    Wright, M. N. & Ziegler, A. Ranger: A fast implementation of random  
634            forests for high dimensional data in C++ and R. *J. Stat. Softw.* **77**, 1–17  
635            (2017).
- 636
- 637

638 **Acknowledgements**

639

640 The authors acknowledge funding from the Australian Research Council Centre of  
641 Excellence for Translational Photosynthesis (CE140100015). We wish to  
642 acknowledge the hard work of the many researchers and agronomists who collected  
643 the historical agronomic data for the Grains Research and Development Corporation  
644 National Variety Trials used in the work described here.

645

646 **Author contributions**

647

648 SJN conceived and designed the study, wrote the code, performed the analysis,  
649 designed and plotted the figures, and co-wrote the manuscript. RF co-wrote the  
650 manuscript and contributed to the experiment design.

651

652 **Competing Financial Interests**

653

654 The authors declare no competing financial interests.

655

656 **Materials & Correspondence**

657

658 Correspondence to [saul.newman@anu.edu.au](mailto:saul.newman@anu.edu.au)

659

660 All data and code are available from the supplementary materials the linked Database  
661 Descriptor publication uploaded to *Scientific Data* and the figshare repository<sup>6</sup>.

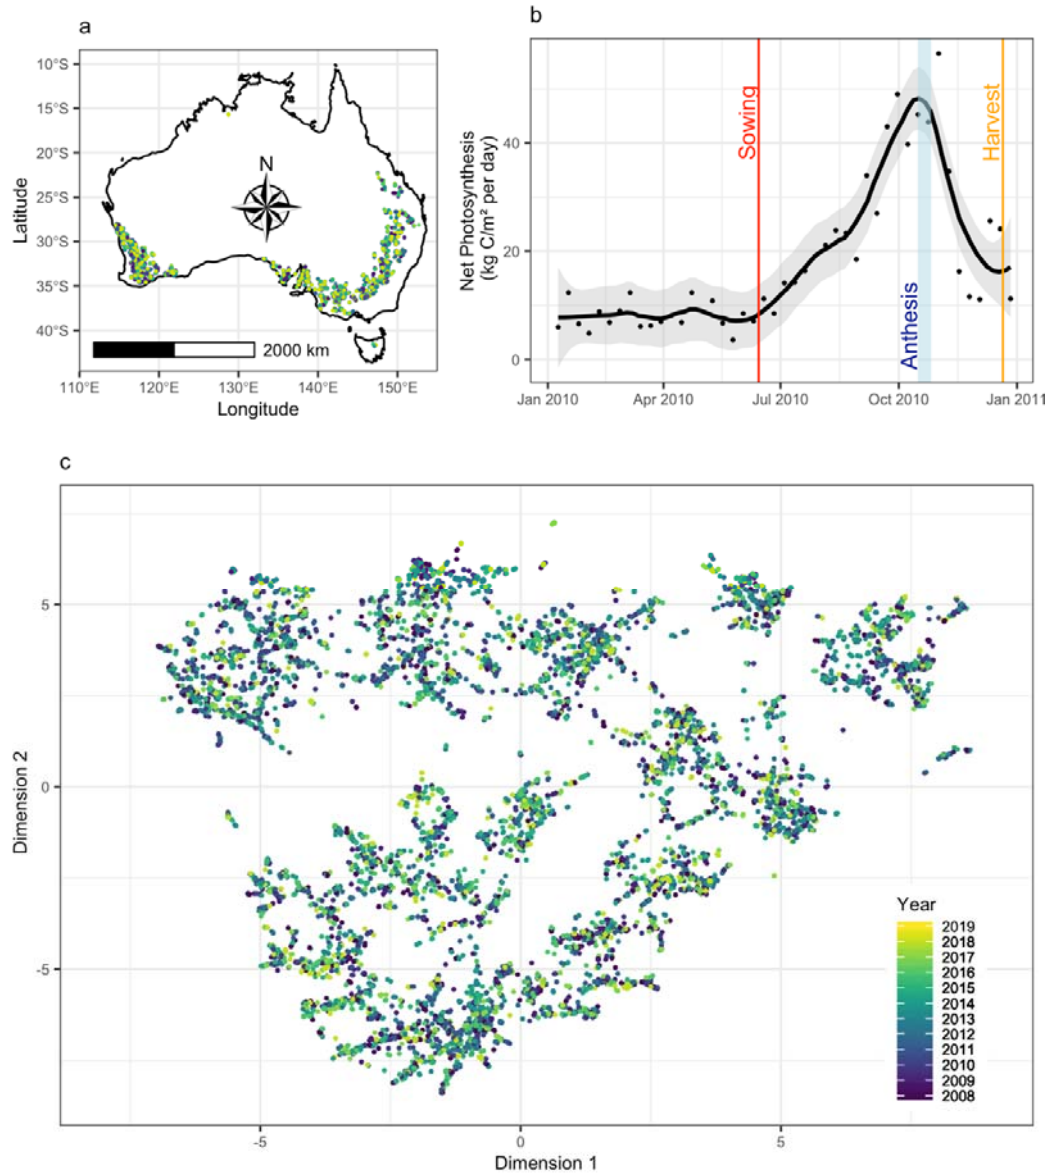

662  
663

**Figure 1. National variety trials and large-scale environmental patterns captured**

664 **by satellite.** Location of 6,547 successful field trial experiments **a**, tracked from  
665 2008-2019 using remote sensing and ground station data. Remote sensing data  
666 captures environmental patterns at each location, through variables such as **b** net  
667 primary photosynthesis (black points; locally weighted smoothed spline), from pre-  
668 sowing, through the sowing date (red line), anthesis (blue shaded region), and harvest  
669 (orange), to post-harvest. These remote sensing data reveal environmental diversity

670 across sites  $\mathbf{c}$ , shown here by Uniform Manifold Approximation and Projection

671 clustering, not captured by weather station data.

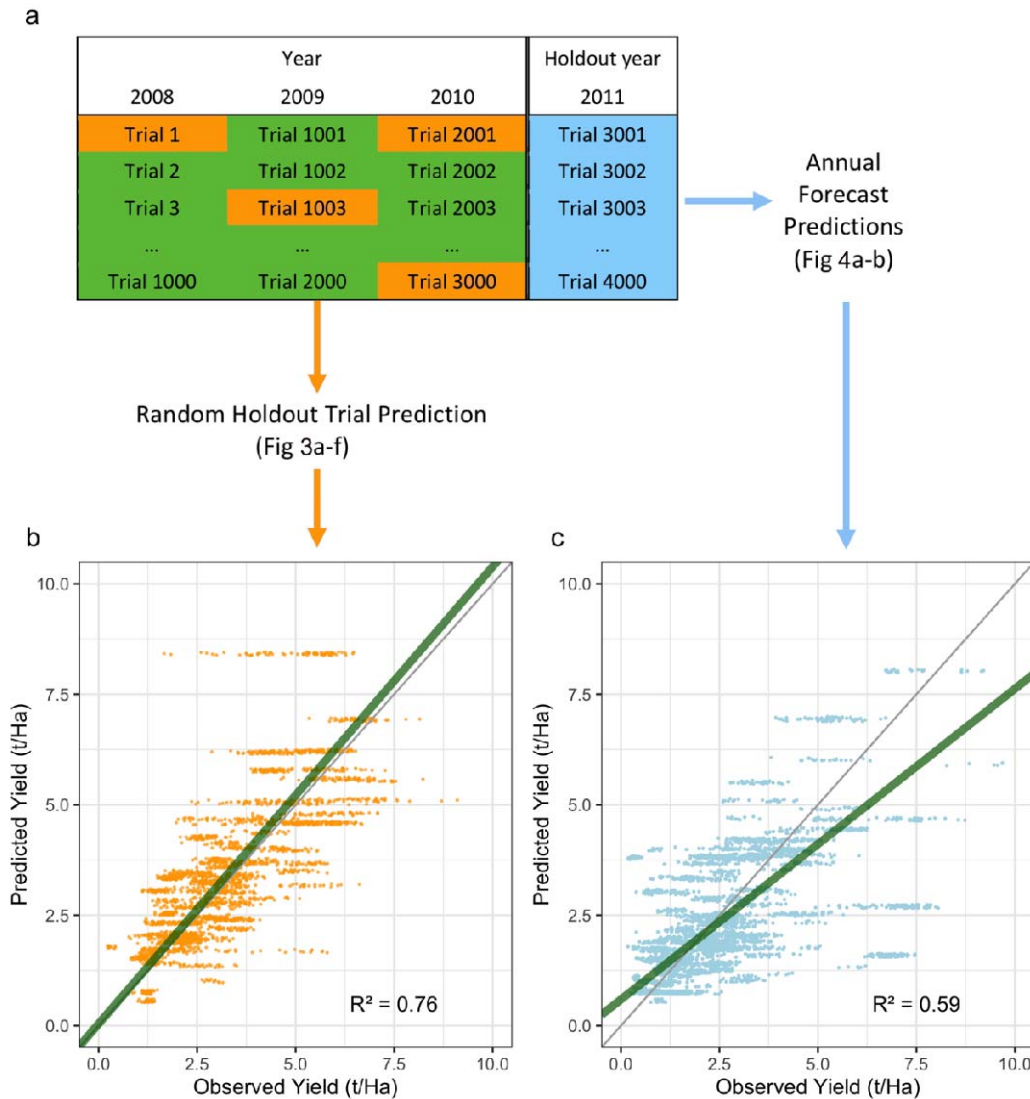

672

673 **Figure 2. Schematic of model training and evaluation.** All machine learning  
674 models are trained **a** on data all years before a given date (dark green), after excluding  
675 100 randomly selected trials (orange). Each ML model is then used to predict  
676 phenotypic variation in both the **b** randomly selected holdout trials (orange) and **c** all  
677 trials in unobserved 'future' years (blue) excluded from model training. Model  
678 accuracy when predicting these holdout samples, as represented by the linear model  
679 fit (green) and residuals in scatterplots **b** and **c** (RPRMs shown), are used for model  
680 evaluation.



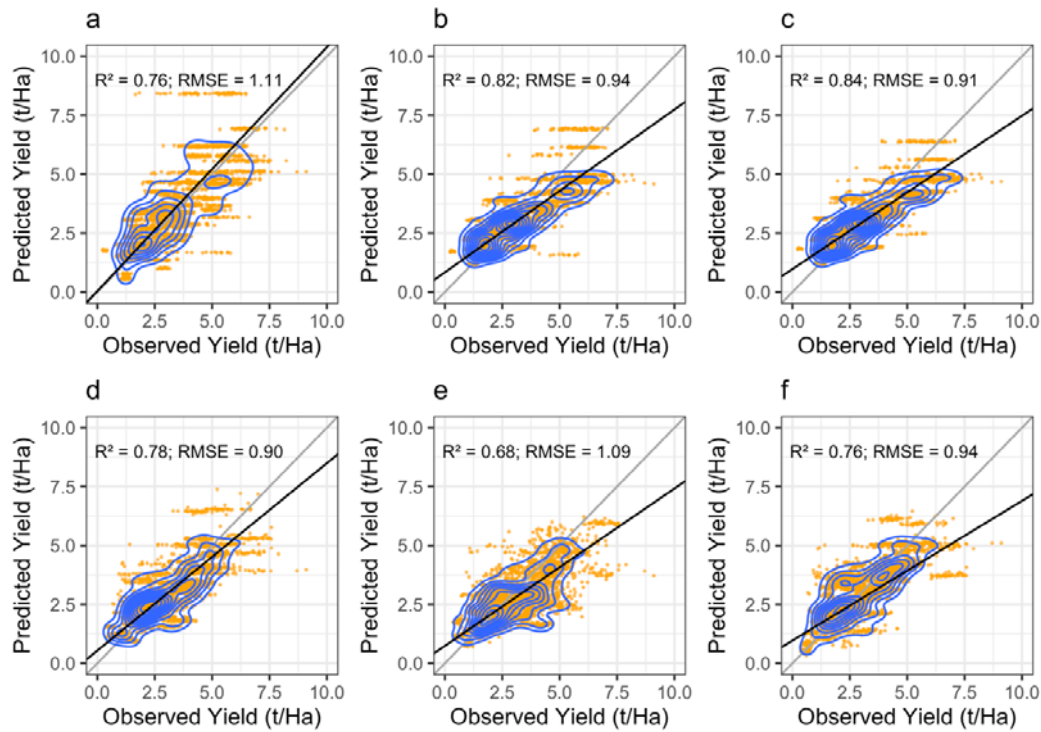

681

682 **Figure 3. Accuracy of yield models subject to holdout trial prediction of 100**

683 **random unobserved field trials.** Predictions of yield variation in 100 randomly

684 selected hold-out field trials, by: **a** recursively partitioned regression model (RPRM)

685 decision tree, **b** naïve or unstratified Breiman-Cutler random forests (BCRFs), **c** year-

686 stratified BCRFs, **d** an extreme gradient boosting machine, **e** linear support vector

687 regression, and **f** partial least squares regression (RMSE is root mean squared error; **a-**

688 **c** sample size  $N = 3,182$ ; **e-f** sample size  $N=3,101$ ; all  $p < 2.2e-16$ ). Horizontal banding

689 in tree-based models **a-d** is due to grouping of predictions into terminal decision tree

690 nodes, y-axis is randomly jittered, blue contour lines indicate kernel density.

691

692

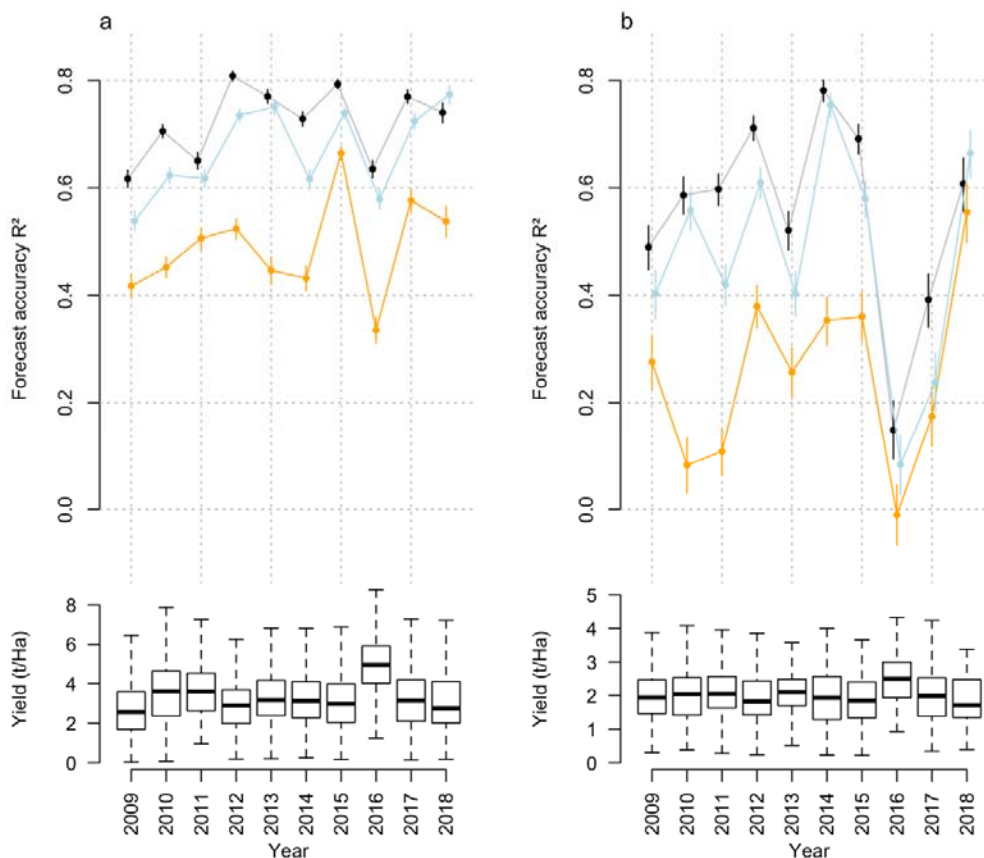

693

694

**Figure 4. Cross-model and cross-species shifts in accuracy under rolling annual**

695

**forecast prediction.** Across diverse methods and phenotypes, annual forecast

696

predictions of **a**, wheat and **b**, canola phenotypes display substantial annual shifts in

697

accuracy, absent any change in model parameters or target sample size. Forecasting

698

years with high yields, in 2016 and in 2013 for canola (boxplots, bottom), was

699

coincident with reduced model accuracy, but otherwise models display no clear

700

pattern. Colours indicate models trained using naïve BCRFs (black), LSVMs

701

(orange), and PLSR models (blue), whiskers indicate 95% CI.

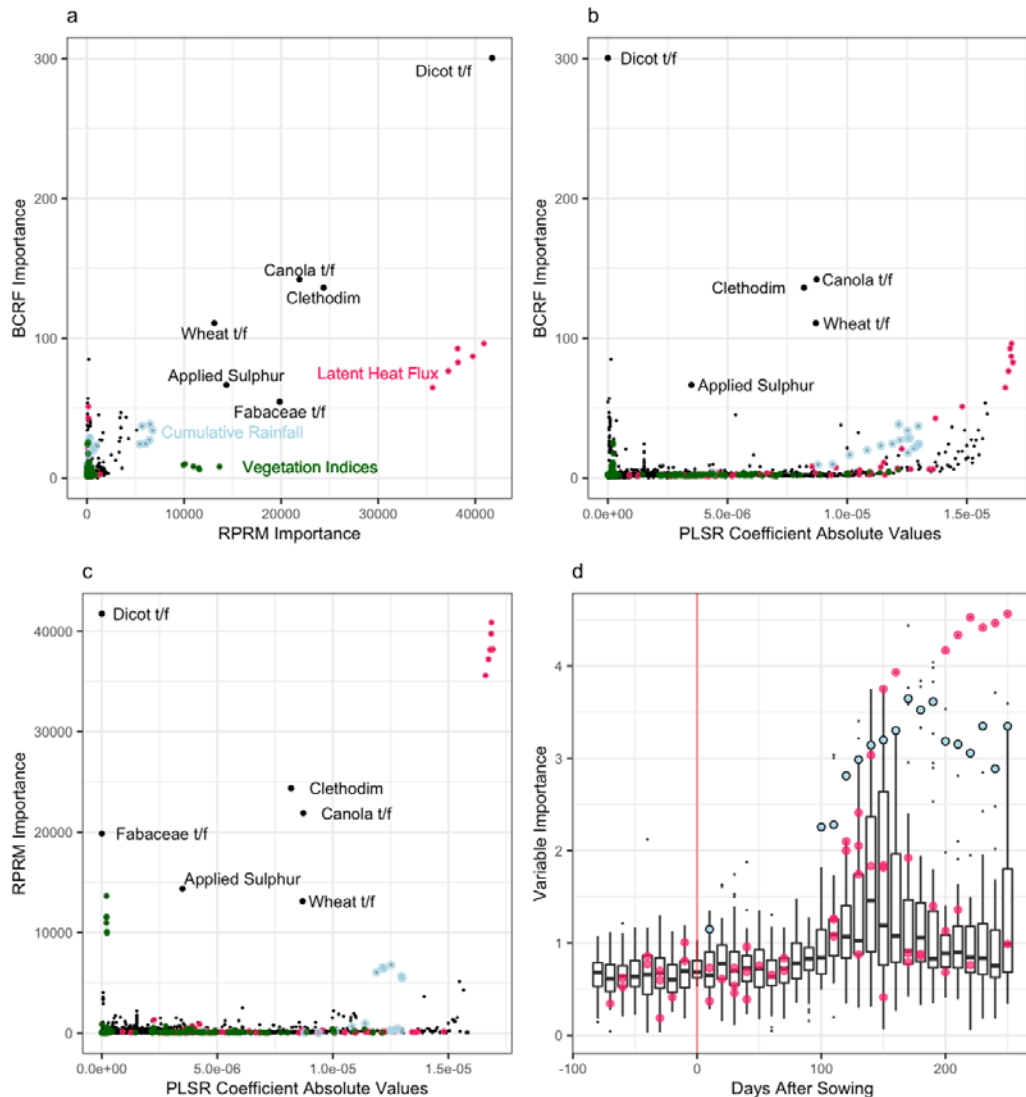

702  
703

**Figure 5. Concordance and pattern of variable importance across machine**

704

**learning models.** Variable importance indicators, as measured by voting heuristics in

705

BCRF models (y-axes in **a** and **b**), the absolute value of coefficients in PLSR models

706

(x-axes in **b** and **c**), or error reduction or shrinkage in RPRM models (x-axis in **a**, y-

707

axis in **c**), showed some concordance between models. Likewise, as shown for BCRF

708

models in **d**, the predictive importance of time-ordered variables increased throughout

709

the season to a maximum around flowering and grain filling. Highly ranked variables

710

across all models included cumulative total rainfall (blue), latent heat flux (fuchsia),

- 711 dosage of the pesticide Clethodim (labelled), total applied sulphur fertiliser (labelled)
- 712 and crop taxa (labelled). Models trained using full-season data shown.

713 **Table 1. Frequency of a million key agronomic traits by species.**

| Phenotype                        | Wheat | Oat  | Triticale | Barley | Canola | Lupin | Chickpea | Faba Bean | Field Pea | Lentil |
|----------------------------------|-------|------|-----------|--------|--------|-------|----------|-----------|-----------|--------|
| Early Growth                     | 7709  | 1229 | 1350      | 4258   | 5084   | 1168  | 1616     | 1104      | 1882      | 768    |
| Establishment                    | 9768  | 2561 | 2027      | 6116   | 6768   | 1804  | 1706     | 1347      | 2683      | 1300   |
| Flowering 50pct                  | 4826  | 748  | 734       | 1848   | 3326   | 805   | 963      | 566       | 864       | 473    |
| % Glucosinolates                 | 0     | 0    | 0         | 0      | 12460  | 0     | 0        | 0         | 0         | 0      |
| Heading date                     | 2084  | 561  | 279       | 1581   | 1355   | 453   | 388      | 359       | 313       | 109    |
| Hectolitre weight                | 16684 | 4585 | 2473      | 8318   | 15170  | 5140  | 5343     | 3706      | 4460      | 1993   |
| Hectolitre weight (metadata)     | 57863 | 3281 | 2212      | 15445  | 0      | 0     | 0        | 0         | 0         | 0      |
| Height cm                        | 3223  | 668  | 609       | 1691   | 2474   | 571   | 586      | 485       | 516       | 192    |
| Lodging score                    | 4334  | 614  | 885       | 2152   | 3116   | 756   | 1036     | 849       | 659       | 465    |
| Oil content                      | 0     | 0    | 0         | 0      | 12611  | 0     | 0        | 0         | 0         | 0      |
| Pct below 2.0 mm                 | 11839 | 3704 | 1415      | 6745   | 11158  | 4499  | 3987     | 3315      | 3826      | 1327   |
| Pct below 2.2 mm                 | 4624  | 881  | 1086      | 1477   | 3963   | 577   | 1356     | 389       | 634       | 620    |
| Protein                          | 16681 | 4585 | 2501      | 8195   | 15192  | 5146  | 5343     | 3706      | 4514      | 2003   |
| Protein (metadata)               | 57863 | 3281 | 2212      | 1298   | 0      | 0     | 0        | 0         | 0         | 0      |
| Protein meal                     | 1994  | 309  | 217       | 833    | 10699  | 343   | 0        | 84        | 605       | 115    |
| Sieve 2.0mm (metadata)           | 42305 | 1733 | 1923      | 0      | 0      | 0     | 0        | 0         | 0         | 0      |
| Thousand grain weight            | 13537 | 3567 | 1773      | 7281   | 12459  | 3754  | 4318     | 3006      | 3682      | 1652   |
| Thousand grain weight (metadata) | 62872 | 3281 | 2212      | 17135  | 1869   | 0     | 0        | 0         | 0         | 0      |
| Site-Relative Yield              | 73536 | 4892 | 2371      | 22145  | 18037  | 2877  | 5405     | 3592      | 4786      | 2709   |
| Yield, t/Ha                      | 54658 | 3873 | 2081      | 14117  | 14929  | 2747  | 3677     | 2224      | 3896      | 2260   |
| Zadoks Score                     | 2282  | 200  | 461       | 1130   | 1657   | 162   | 117      | 133       | 345       | 395    |
| Pass-Fail Yield Status           | 73536 | 4892 | 2371      | 17377  | 18037  | 2877  | 5405     | 3592      | 4786      | 2709   |

714 Metadata in brackets indicate metadata-derived measurements that partially overlap reported data.

715 **Table 2. Yield prediction accuracy over diverse species and models.**  
716

| Random Holdout<br>Trial Prediction | Accuracy R <sup>2</sup> of models trained on all data to: |        |        |
|------------------------------------|-----------------------------------------------------------|--------|--------|
| Model                              | TOS                                                       | 100DAS | 200DAS |
| RPRM                               | 0.60                                                      | 0.66   | 0.76   |
| Naïve BCRF                         | 0.76                                                      | 0.79   | 0.82   |
| xvBCRF                             | 0.80                                                      | 0.81   | 0.84   |
| XGBM                               | 0.64                                                      | 0.73   | 0.78   |
| LSVM                               | 0.64                                                      | 0.64   | 0.68   |
| PLSR                               | 0.58                                                      | 0.73   | 0.76   |
| Annual Forecasting Predictions     |                                                           |        |        |
| Model                              | TOS                                                       | 100DAS | 200DAS |
| RPRM                               | 0.58                                                      | 0.42   | 0.59   |
| Naïve BCRF                         | 0.67                                                      | 0.71   | 0.70   |
| xvBCRF                             | 0.68                                                      | 0.72   | 0.69   |
| XGBM                               | 0.52                                                      | 0.61   | 0.69   |
| LSVM                               | 0.38                                                      | 0.37   | 0.45   |
| PLSR                               | 0.58                                                      | 0.68   | 0.74   |

717 DAS (Days After Sowing); TOS (Time of Sowing)

718 **Table 3. Variable interactions predicting canola yield.**

| Conditional Rule Chain                                                                                                                                                | Frequency<br>in Forest<br>(%) | Rule<br>Error<br>rate | Rescaled<br>Importance<br>Score | Rule-<br>Predicted<br>Yield (t/Ha) |
|-----------------------------------------------------------------------------------------------------------------------------------------------------------------------|-------------------------------|-----------------------|---------------------------------|------------------------------------|
| CS Rainfall 150DAS $\leq$ 313.90 &<br>Min Reflectance Band 7 160DAS $>$ 0.10 &<br>NDVI 180DAS $\leq$ 129.71                                                           | 0.19                          | 0.56                  | 1.00                            | 1.70                               |
| CS Minimum Temperature TOS $\leq$ 1259.40 &<br>CS Rainfall 150DAS $>$ 260.35 &<br>Max Daytime LST 170DAS $\leq$ 52.16                                                 | 0.56                          | 1.20                  | 0.59                            | 2.58                               |
| CS Rainfall 140 $\leq$ 250.85 &<br>Mean EVI 40DBS $\leq$ 0.13 &<br>Potential Evapotranspiration Var. 130DAS $>$<br>2.17 &<br>Mean Reflectance Band 3 150DAS $>$ 0.037 | 0.05                          | 0.23                  | 0.30                            | 1.12                               |
| Mean NDVI 160DAS $\leq$ 0.37 &<br>Min Reflectance Band 3 160DAS $>$ 0.048 &<br>Max Red Reflectance 170DAS $\leq$ 0.22                                                 | 0.14                          | 2.49                  | 0.27                            | 5.25                               |
| CS Rainfall 140DAS $\leq$ 282.05 &<br>Min Reflectance Band 2 90DAS $>$ 0.19 &<br>Max Potential LHF 110DAS $\leq$ 8.09e+6 &<br>Max EVI 150DAS $\leq$ 0.39              | 0.34                          | 0.89                  | 0.27                            | 2.18                               |
| CS Rainfall 100DAS $\leq$ 286.20 &<br>Max Evapotranspiration 50DBS $>$ 3.69 &<br>Min GPP 170DAS $\leq$ 0.017                                                          | 0.04                          | 0.21                  | 0.25                            | 1.00                               |
| Max NIR 20DBS $>$ 0.18 &<br>Mean Daytime LST 10DAS $>$ 37.58 &<br>Mean Red Reflectance 150DAS $\leq$ 0.081 &<br>Diquat applied $\leq$ 192.5                           | 0.02                          | 0.14                  | 0.21                            | 0.79                               |
| CS Rainfall 110DAS $>$ 213.05 &<br>Min GPP 40DBS $\leq$ 0.0043 &<br>Min NDVI 10DAS $\leq$ 0.26 &<br>Max MIR 140DAS $\leq$ 0.11                                        | 0.04                          | 0.57                  | 0.18                            | 2.98                               |
| Reflectance Band 7 120DAS $\leq$ 40.07 &<br>Min MIR 150DAS $>$ 0.19                                                                                                   | 0.11                          | 0.96                  | 0.14                            | 3.42                               |
| CS Rainfall 100DAS $>$ 290.1 &<br>Max NDVI 50DBS $>$ 0.21 &<br>Min Net Photosynthesis TOS $>$ 0.0051 &<br>Max EVI 170DAS $\leq$ 0.20                                  | 0.14                          | 1.09                  | 0.06                            | 3.52                               |
| CS Rainfall 180DAS $>$ 352.55 &<br>Mean Evapotranspiration 60DAS $>$ 8.83 &<br>Max EVI 130DAS $\leq$ 0.45                                                             | 0.03                          | 0.81                  | 0.04                            | 3.63                               |
| Min Red Reflectance 50DBS $>$ 0.14 &<br>Mean Daytime LST 40DBS $>$ 53.25 &<br>Net Photosynthesis 190DAS $\leq$ 8.80                                                   | 0.01                          | 0.65                  | 0.04                            | 3.69                               |

719 Days after Sowing (DAS), Days before sowing (DBS), Cumulative Sum from 90 days before sowing  
720 (CS), Enhanced Vegetation Index (EVI), Normalised Differenced Vegetation Index (NDVI), Gross  
721 Primary Productivity (GPP), Land Surface Temperature in Celsius (LST), Latent Heat Flux (LHF), all  
722 values rounded to 2 significant digits.

723

724 **Table 4. Variable interactions predicting wheat yield.**

| Conditional Rule Chain                                                                                                                                                                         | Frequency<br>in Forest<br>(%) | Rule<br>Error<br>rate | Rescaled<br>Importance<br>Score | Rule-<br>Predicted<br>Yield (t/Ha) |
|------------------------------------------------------------------------------------------------------------------------------------------------------------------------------------------------|-------------------------------|-----------------------|---------------------------------|------------------------------------|
| Mean Night-time LST 40DAS <= 27.33 &<br>Evapotranspiration Var. 90DAS <= 1.39e+08 &<br>Min Reflectance Band 6 130DAS > 0.23 &<br>MIR 190DAS > 56.88                                            | 0.19                          | 0.56                  | 1.00                            | 1.70                               |
| FPAR 120DAS > 43.93 &<br>Max Reflectance Band 6 140DAS > 0.21 &<br>Max FPAR 170DAS <= 0.42                                                                                                     | 0.56                          | 1.20                  | 0.59                            | 2.58                               |
| Max FPAR 100DAS <= 0.60 &<br>Min NDVI 130DAS <= 0.41 &<br>Mean MIR 180DAS > 0.32                                                                                                               | 0.05                          | 0.23                  | 0.30                            | 1.12                               |
| Mean EVI 160DAS > 0.28 &<br>Max NIR 170DAS > 0.34                                                                                                                                              | 0.14                          | 2.49                  | 0.27                            | 5.25                               |
| Emissivity Band 32 Var. 70DAS <= 1.089e-06 &<br>Mean Reflectance Band 6 140DAS > 0.21 &<br>Max MIR 160DAS > 0.21 &<br>GPP 190DAS <= 5.80                                                       | 0.34                          | 0.89                  | 0.27                            | 2.18                               |
| Mean Reflectance Band 4 80DBS > 0.096 &<br>Max MIR 130DAS > 0.29                                                                                                                               | 0.04                          | 0.21                  | 0.25                            | 1.00                               |
| Mean Reflectance Band 7 140DAS > 0.32 &<br>LHF 190DAS <= 3.75e+08                                                                                                                              | 0.02                          | 0.14                  | 0.21                            | 0.79                               |
| Reflectance Band 6 10DBS > 0.27 &<br>Max Net Photosynthesis 150DAS <= 0.036 &<br>GPP 160DAS <= 4.72 &<br>Min MIR 170DAS <= 0.192 &<br>Max GPP 180DAS <= 0.028                                  | 0.04                          | 0.57                  | 0.18                            | 2.98                               |
| Max Reflectance Band 7 30DAS > 0.14 &<br>Mean Net Photosynthesis 60DAS <= 0.014 &<br>Reflectance Band 6 120DAS > 54.81 &<br>Max NDVI 150DAS > 0.53 &<br>Max Net Photosynthesis 180DAS <= 0.029 | 0.11                          | 0.96                  | 0.14                            | 3.42                               |
| Max LAI 160 DAS <= 1.28 &<br>Mean MIR 160 DAS <= 0.19 &<br>Max Net Photosynthesis 170 DAS <= 0.029                                                                                             | 0.14                          | 1.09                  | 0.06                            | 3.52                               |
| Mean Solar Radiation TOS > 12.64 &<br>LHF 80 DAS > 26341250 &<br>Mean NDVI 140 DAS <= 0.59                                                                                                     | 0.03                          | 0.81                  | 0.04                            | 3.63                               |
| CS Rainfall 170 DAS > 262.9 &<br>NDVI Variance 20 DAS <= 7.67e-07 &<br>Min Reflectance Band 7 120DAS > 0.12                                                                                    | 0.01                          | 0.65                  | 0.04                            | 3.69                               |
| Max maximum temperature 180 DAS > 25.40                                                                                                                                                        | 0.98                          | 2.28                  | 0.03                            | 3.33                               |
| Mean Red Reflectance 130 DAS > 0.11 &<br>Red Reflectance 140 DAS > 23.11 &<br>Net Photosynthesis 180 DAS > 8.63                                                                                | 0.06                          | 0.47                  | 0.02                            | 2.09                               |

725  
726

Abbreviations as in Table 3.
